# Supplementary material
Source: PubMed Central journal article supplement (PMC4467166)
Supplement: NIHMS697681-supplement-supplement_figure.pdf [file NIHMS697681-supplement-supplement_figure.pdf]

## Supplementary Materials for

### **Rational development and characterization of humanized anti-EGFR variant III chimeric antigen receptor T cells for glioblastoma**

Laura A. Johnson, John Scholler, Takayuki Ohkuri, Akemi Kosaka, Prachi R. Patel, Shannon E. McGettigan, Arben K. Nace, Tzvete Dentchev, Pramod Thekkat, Andreas Loew, Alina C. Boesteanu, Alexandria P. Cogdill, Taylor Chen, Joseph A. Fraietta, Christopher C. Kloss, Avery D. Posey Jr., Boris Engels, Reshma Singh, Tucker Ezell, Neeraja Idamakanti, Melissa H. Ramones, Na Li, Li Zhou, Gabriela Plesa, John T. Seykora, Hideho Okada, Carl H. June, Jennifer L. Brogdon, Marcela V. Maus\*

\*Corresponding author. E-mail: marcela.maus@uphs.upenn.edu

Published 18 February 2015, *Sci. Transl. Med.* **7**, 275ra22 (2015)

DOI: 10.1126/scitranslmed.aaa4963

#### **This PDF file includes:**

Fig. S1. Untransduced T cells stimulated with U87vIII tumor cells for 16 hours.

#### **Other Supplementary Material for this manuscript includes the following:**

(available at [www.sciencetranslationalmedicine.org/cgi/content/full/7/275/275ra22/DC1](http://www.sciencetranslationalmedicine.org/cgi/content/full/7/275/275ra22/DC1))

Table S1. Source data for Fig. 6A (excel).

Table S2. Source data for Fig. 6B (excel).

Untransduced T cells stimulated with U87vIII tumor cells for 16h

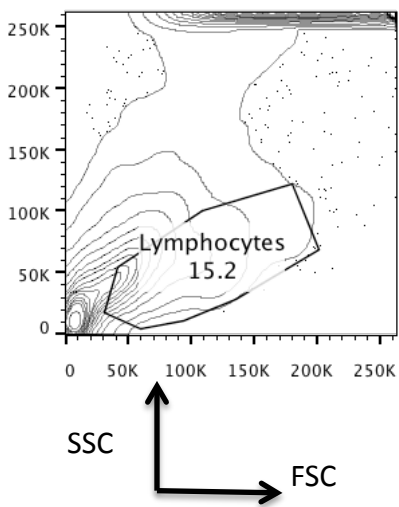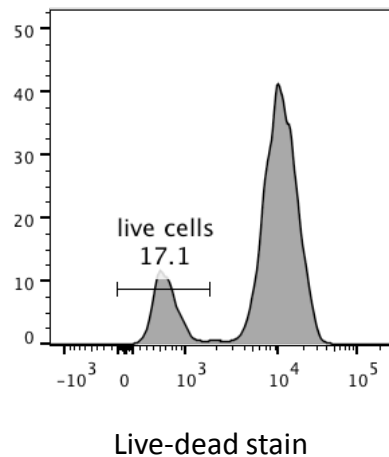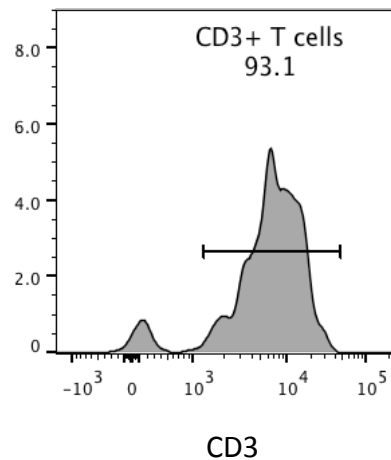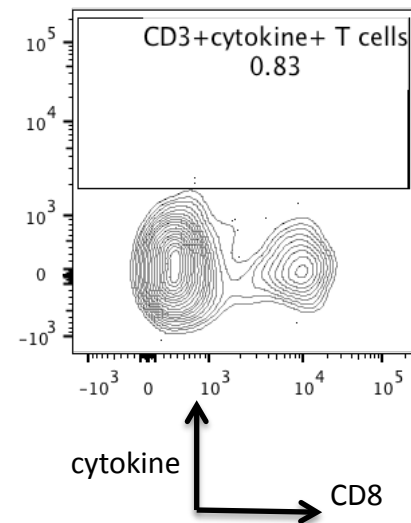

2173 CAR T cells stimulated with U87vIII tumor cells for 16h

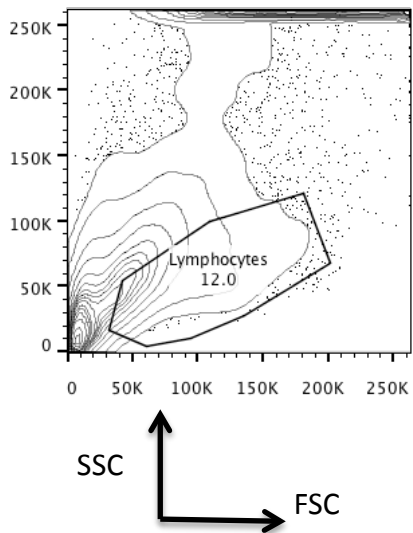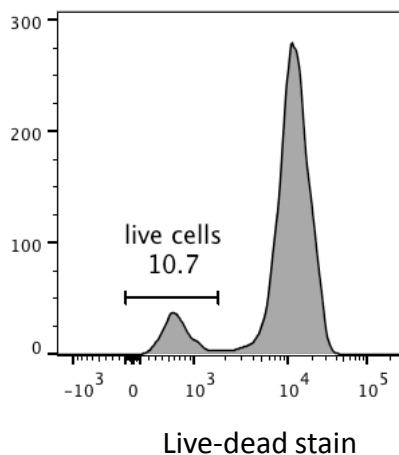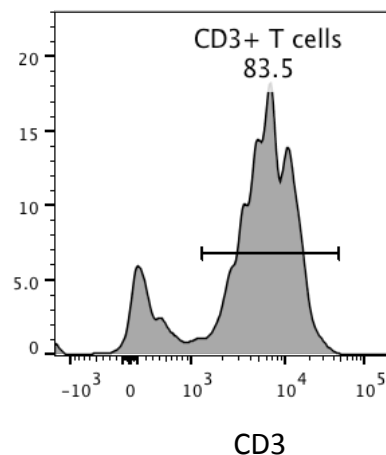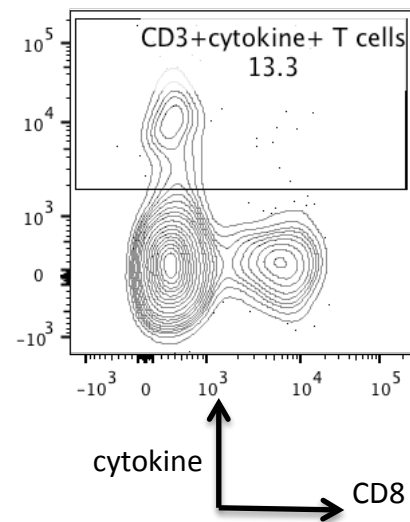

FSC/SSC

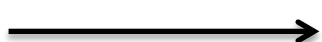

Live-dead

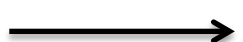

CD3+

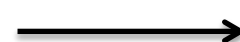

CD8+cytokine+
